# Supplementary material
Source: ML conference proceedings conference paper supplement (https://openaccess.thecvf.com/content/ICCV2025/html/Fu_TeEFusion_Blending_Text_ICCV_2025_paper.html)
Supplement: Supplementary file 1 [file Fu_TeEFusion_Blending_Text_ICCV_2025_supplemental.pdf]

## Appendix for *TeEFusion: Blending Text Embeddings to Distill Classifier-Free Guidance*

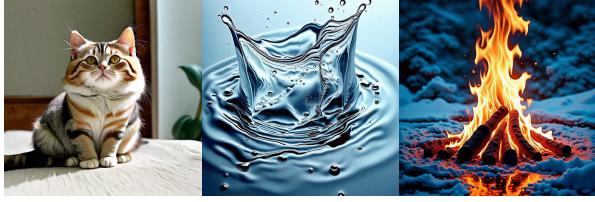

Figure 1. Generation examples of failure cases. Prompt: 1) *not a cat*. 2) *liquid glass*. 3) *cold fire*.

### A. More Experimental Results and Analyses

#### A.1. Quantitative Analysis of Additive Text Embeddings

To validate the effectiveness of additive text embeddings, we conducted quantitative experiments across different text-to-image models. The cosine similarity between original and fused embeddings ( $\text{Cos Sim}_{\text{txt}}$ ) and their corresponding generated images ( $\text{Cos Sim}_{\text{img}}$ ) are summarized in the table below:

| Metric                        | SD3    | In-house T2I | FLUX.1-dev |
|-------------------------------|--------|--------------|------------|
| $\text{Cos Sim}_{\text{txt}}$ | 0.8073 | 0.8192       | 0.8286     |
| $\text{Cos Sim}_{\text{img}}$ | 0.8732 | 0.9137       | 0.9318     |

These results confirm that additive embedding operations preserve over 80% cosine similarity in text space and over 90% in image space, demonstrating their ability to merge diverse semantic patterns effectively.

#### A.2. Operational Boundaries and Failure Cases

Our fusion mechanism  $\mathcal{G}(\psi(w)) \mathcal{F}(c - \emptyset)$  operates within the encoder’s linear regime through bounded sine-cosine positional encodings ( $\|\mathcal{G}(\psi(w)) \mathcal{F}(c - \emptyset)\|_2 \leq \delta$ ). However, failure cases arise when:

- Semantic vectors exhibit non-orthogonality (e.g., contradictory phrases like “cold fire”)
- Contextual interference occurs in composite prompts (e.g., “not a cat”)

These limitations are visualized in Figure 1.
